# Supplementary material
Source: PubMed Central journal article supplement (PMC5975960)
Supplement: NIHMS922002-supplement-1.pdf [file NIHMS922002-supplement-1.pdf]

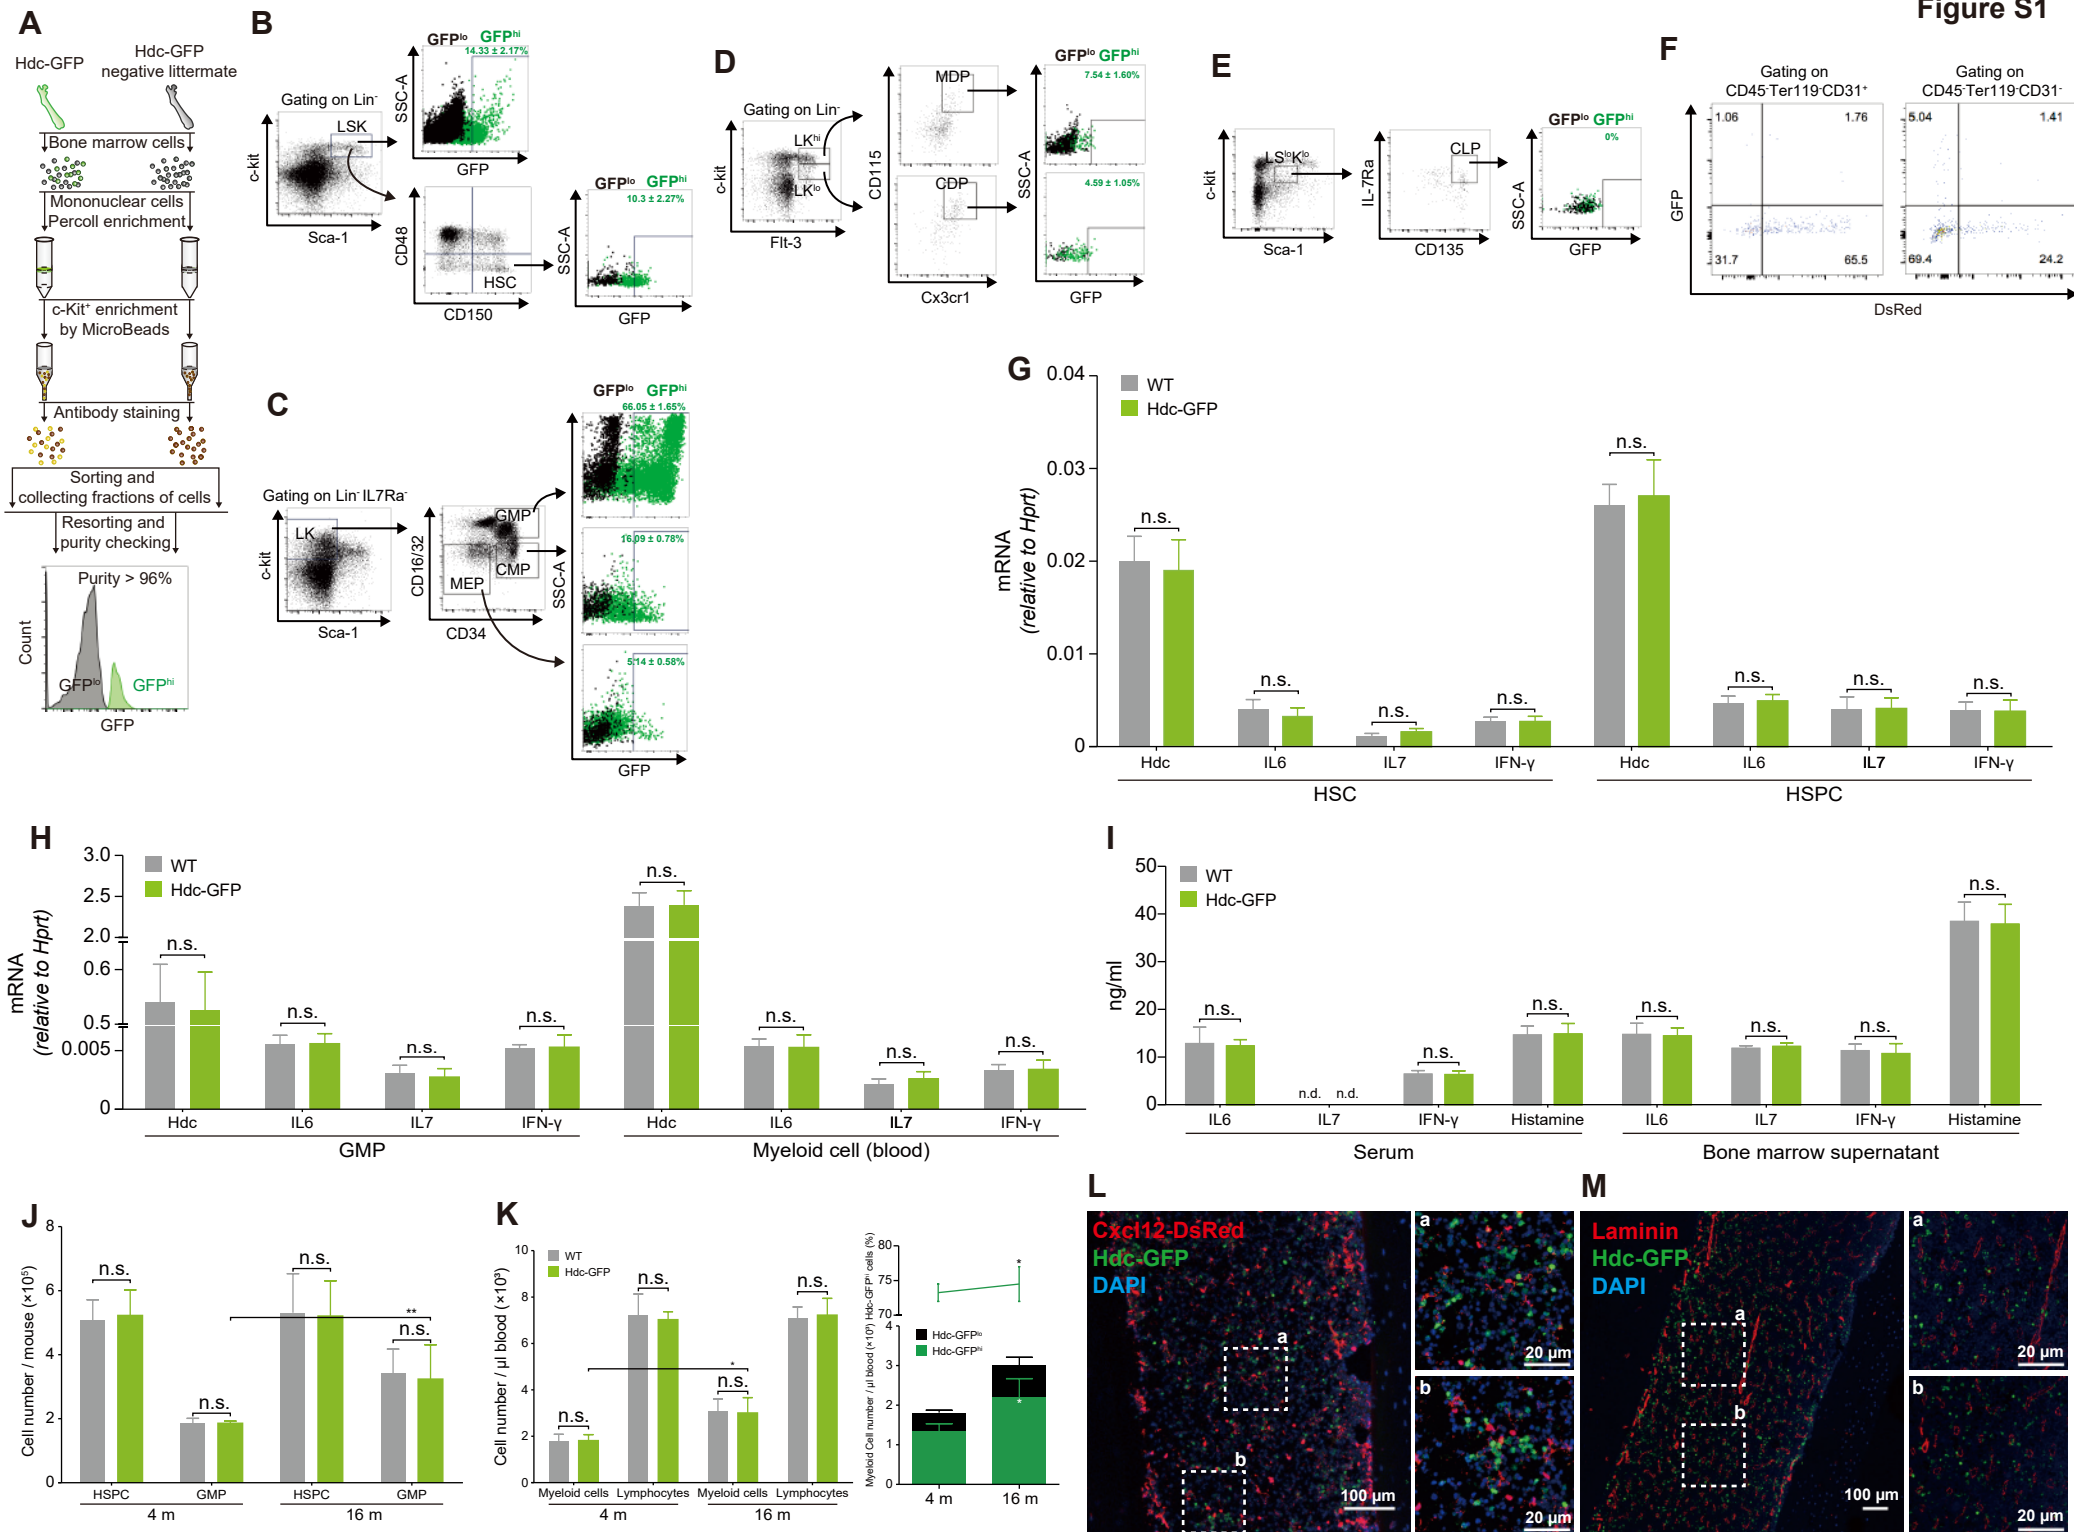

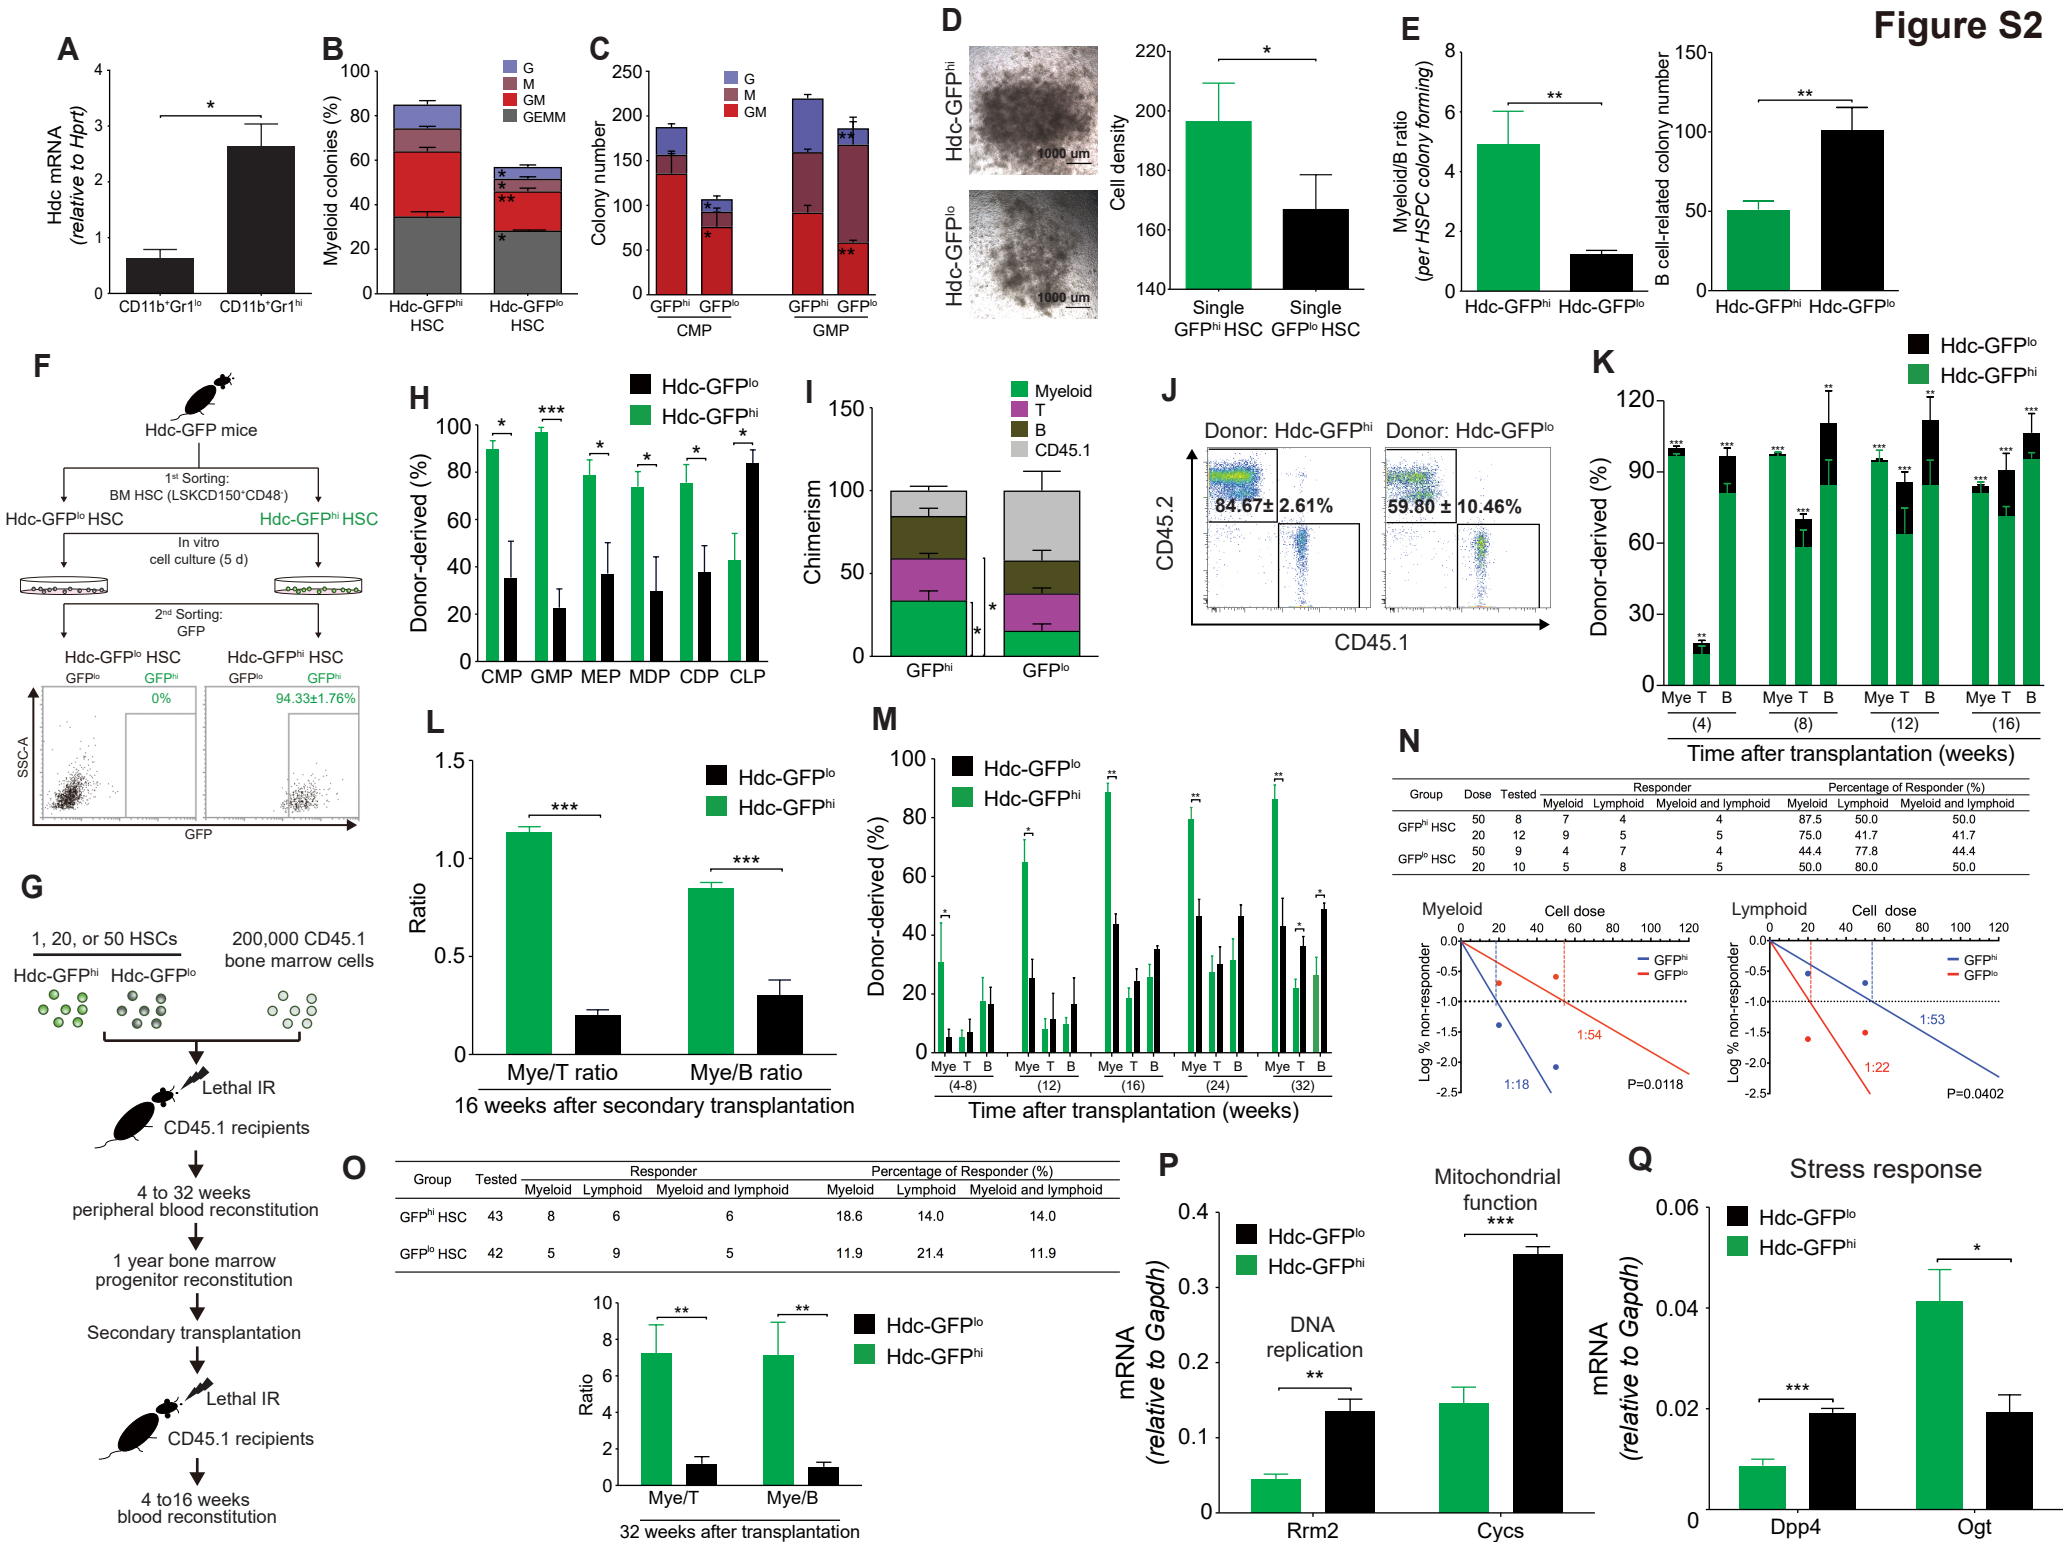

**A**

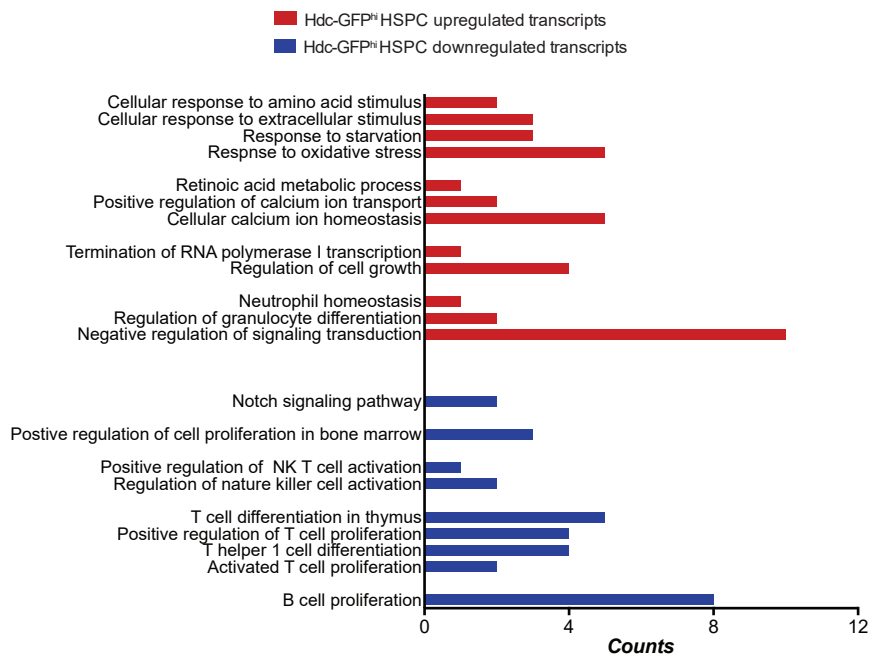

**B**

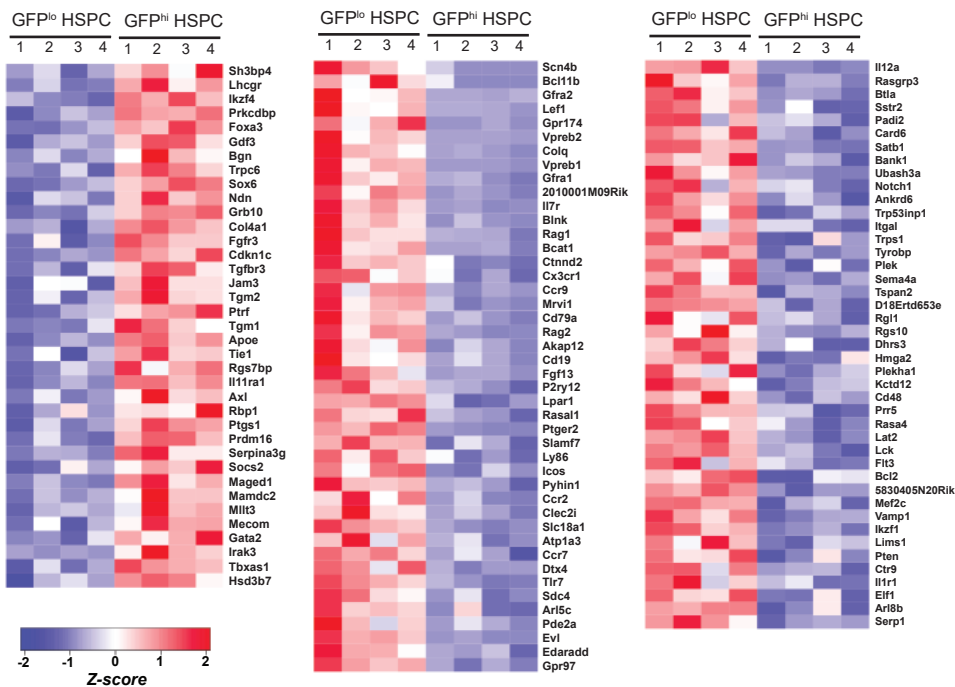

**C**

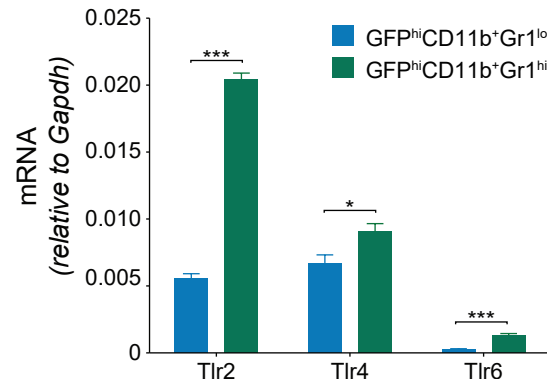

**D**

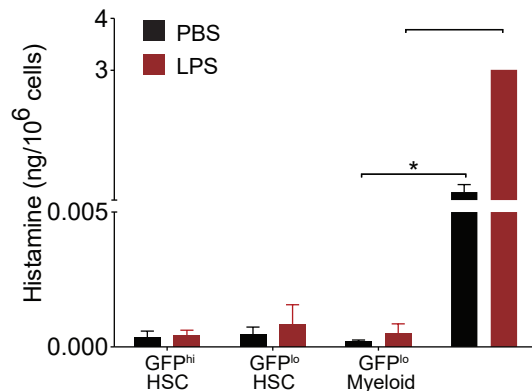

**E**

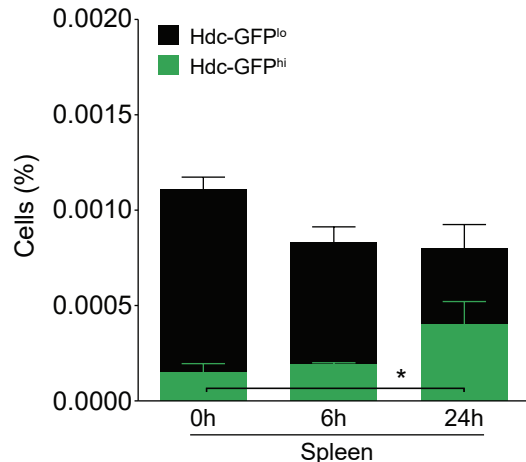

**F**

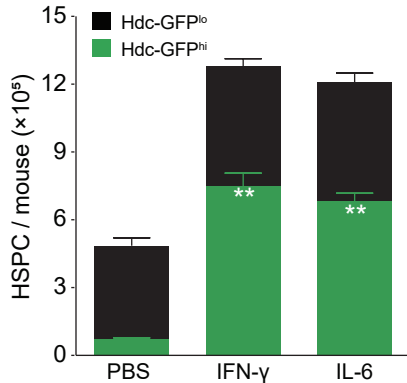

**G**

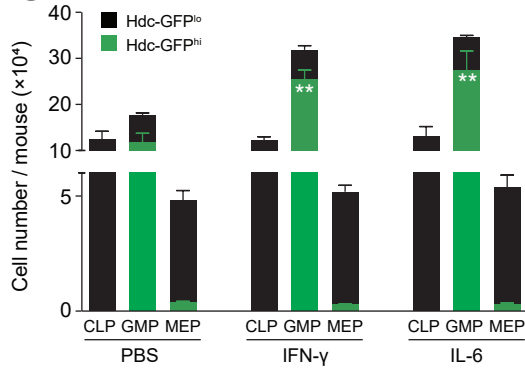

**Figure S4**

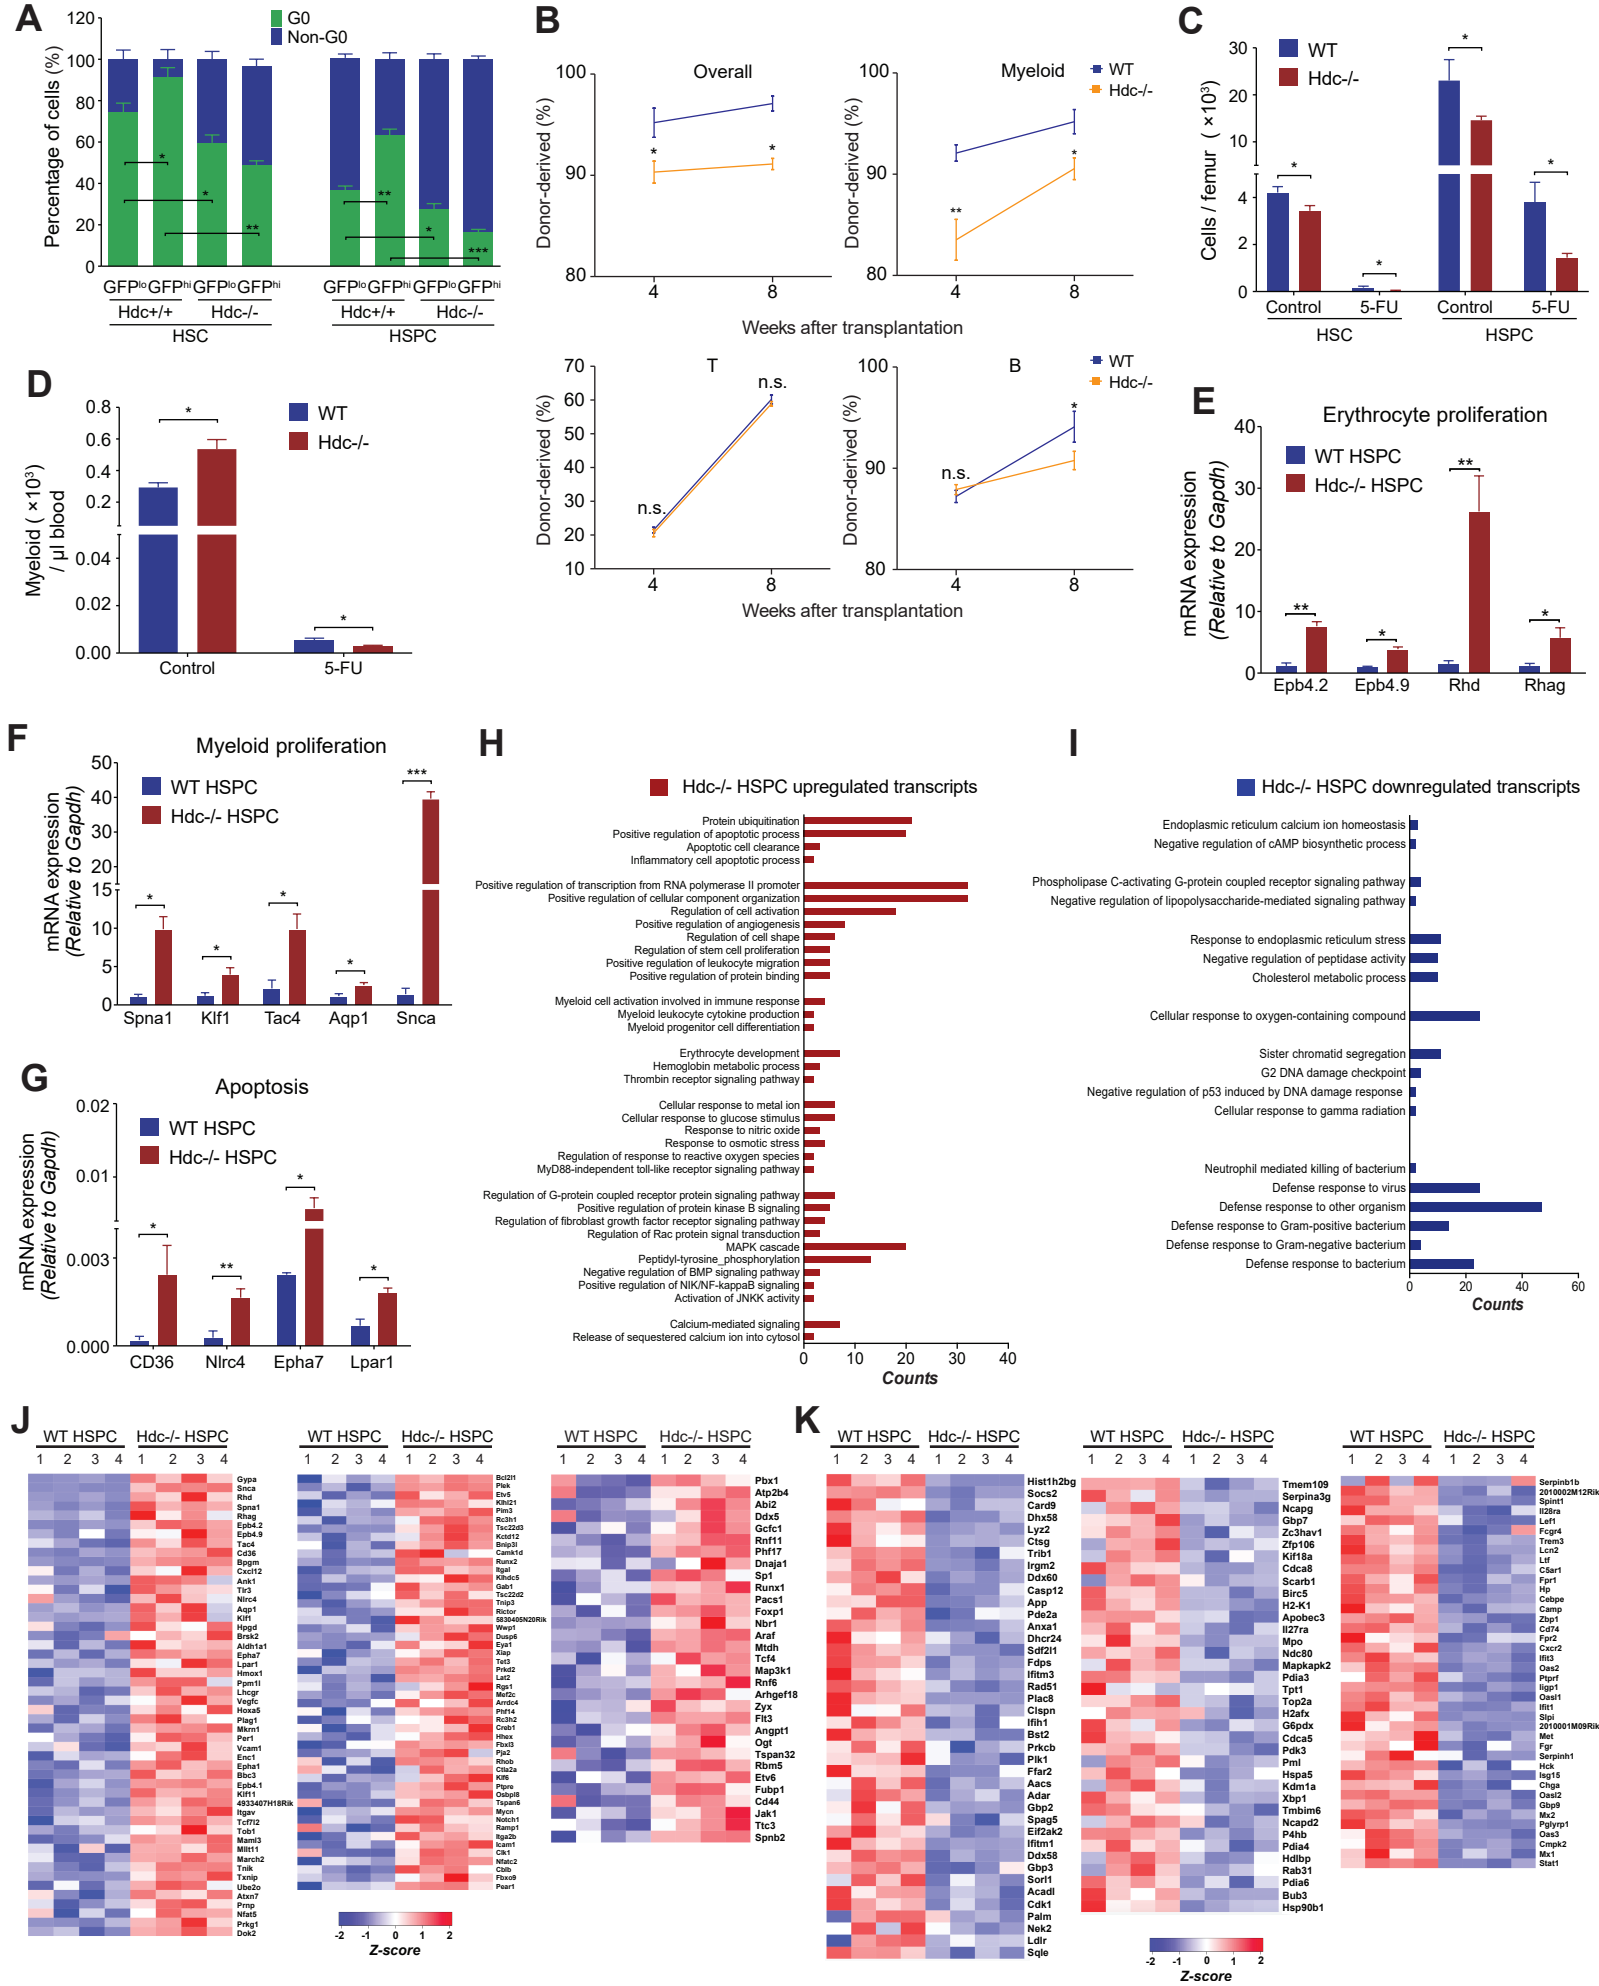

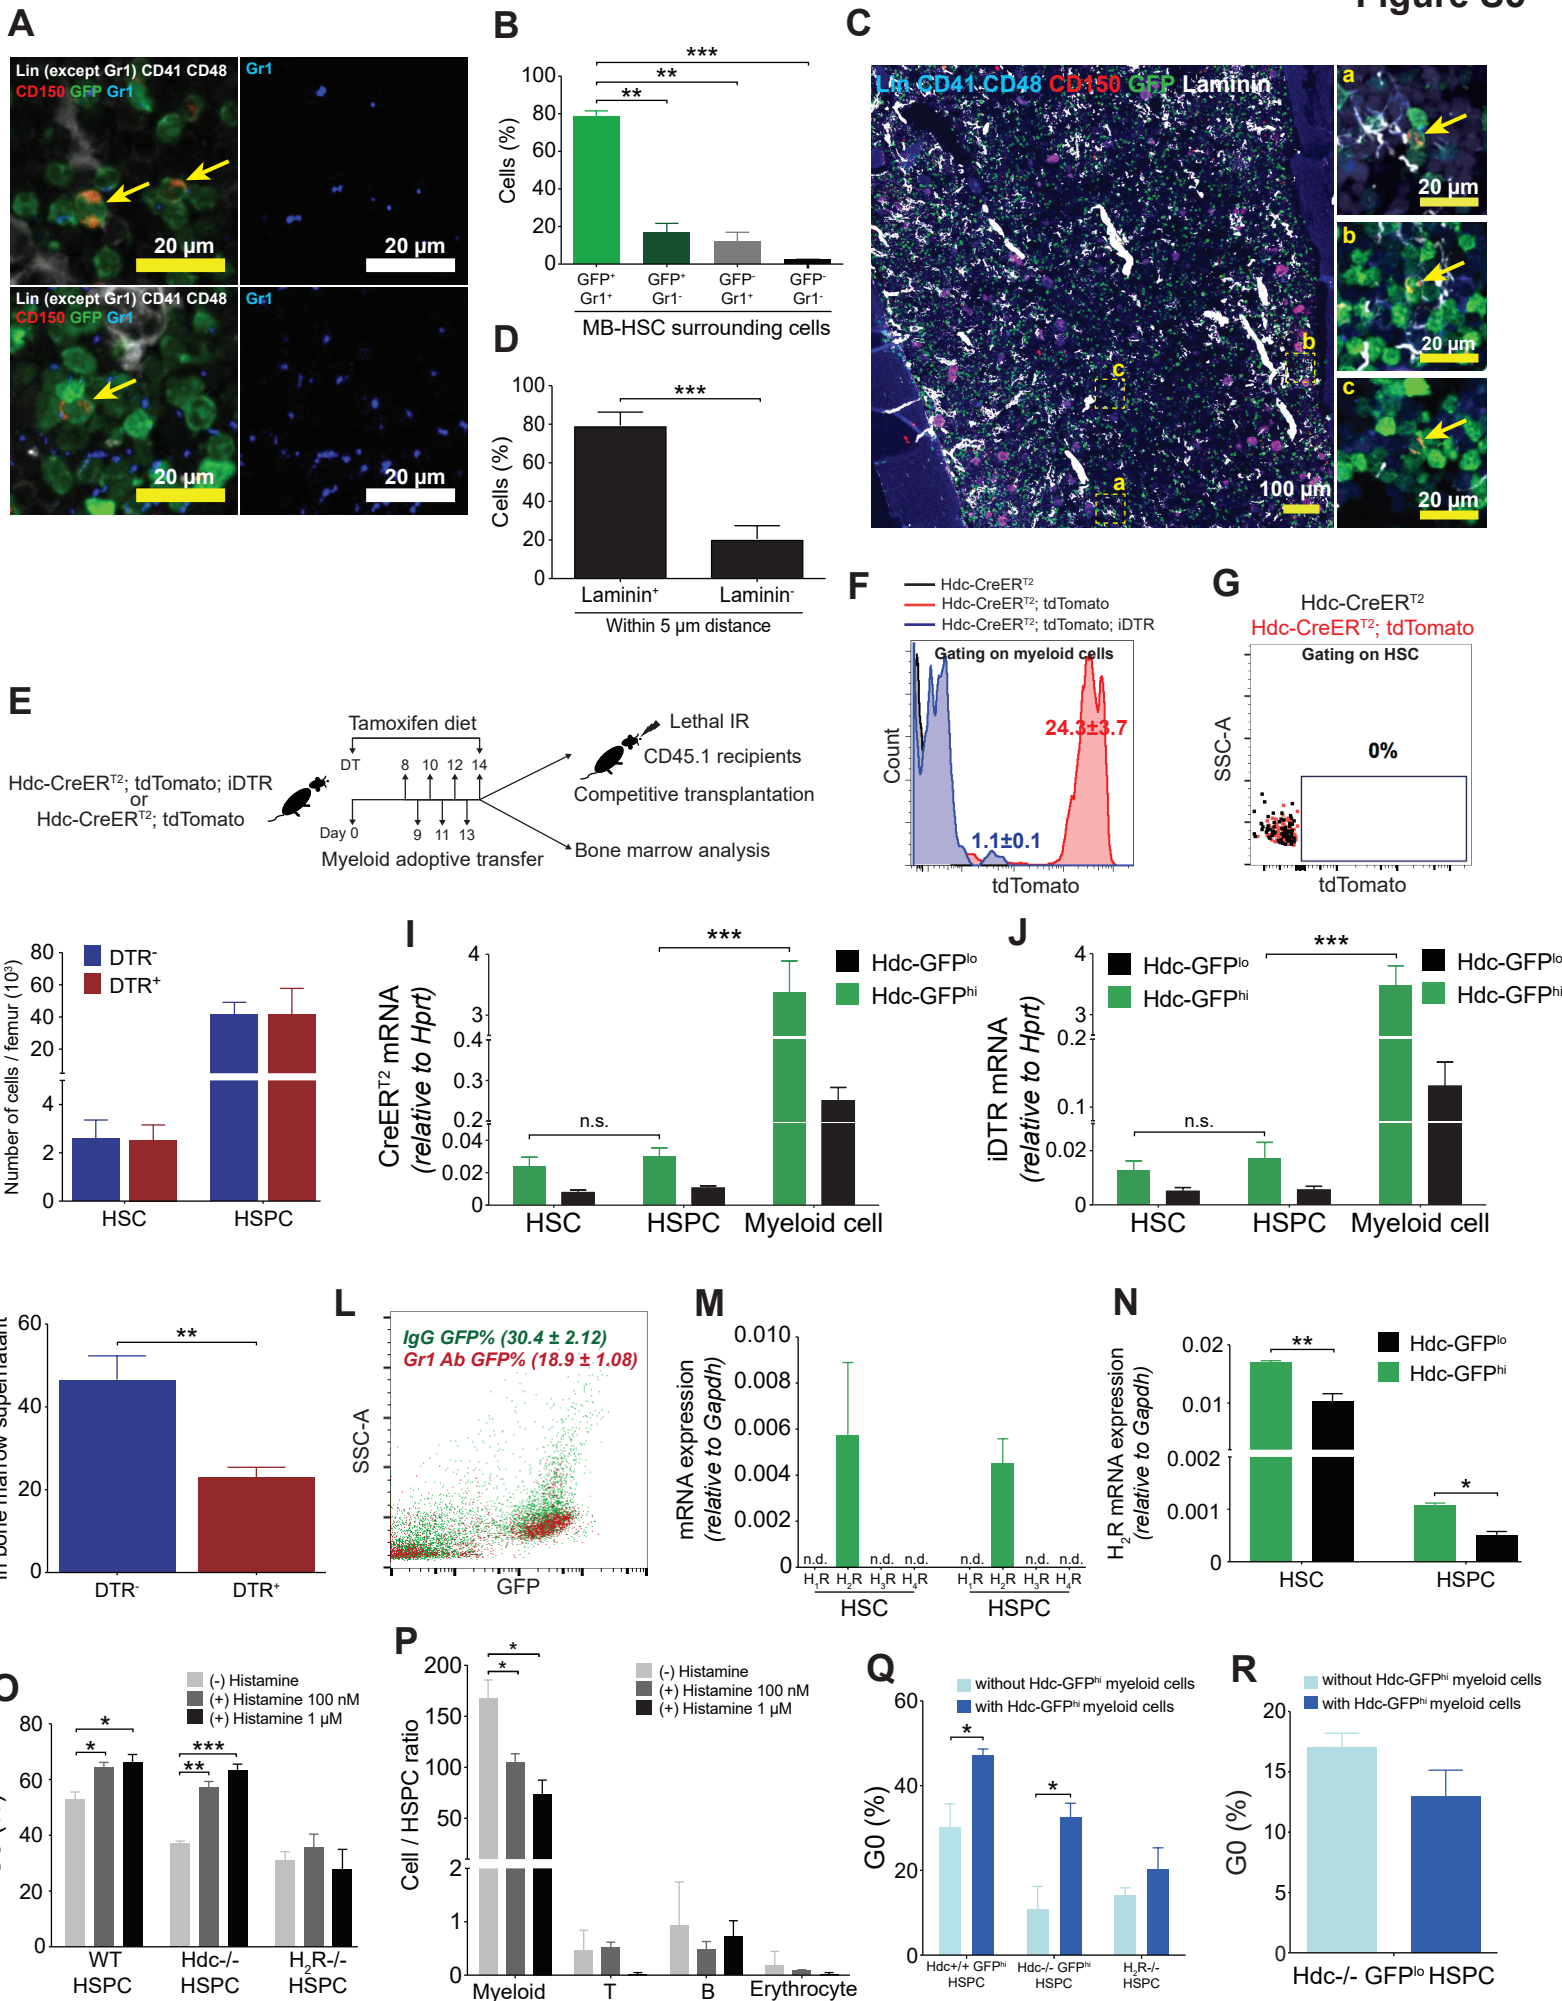

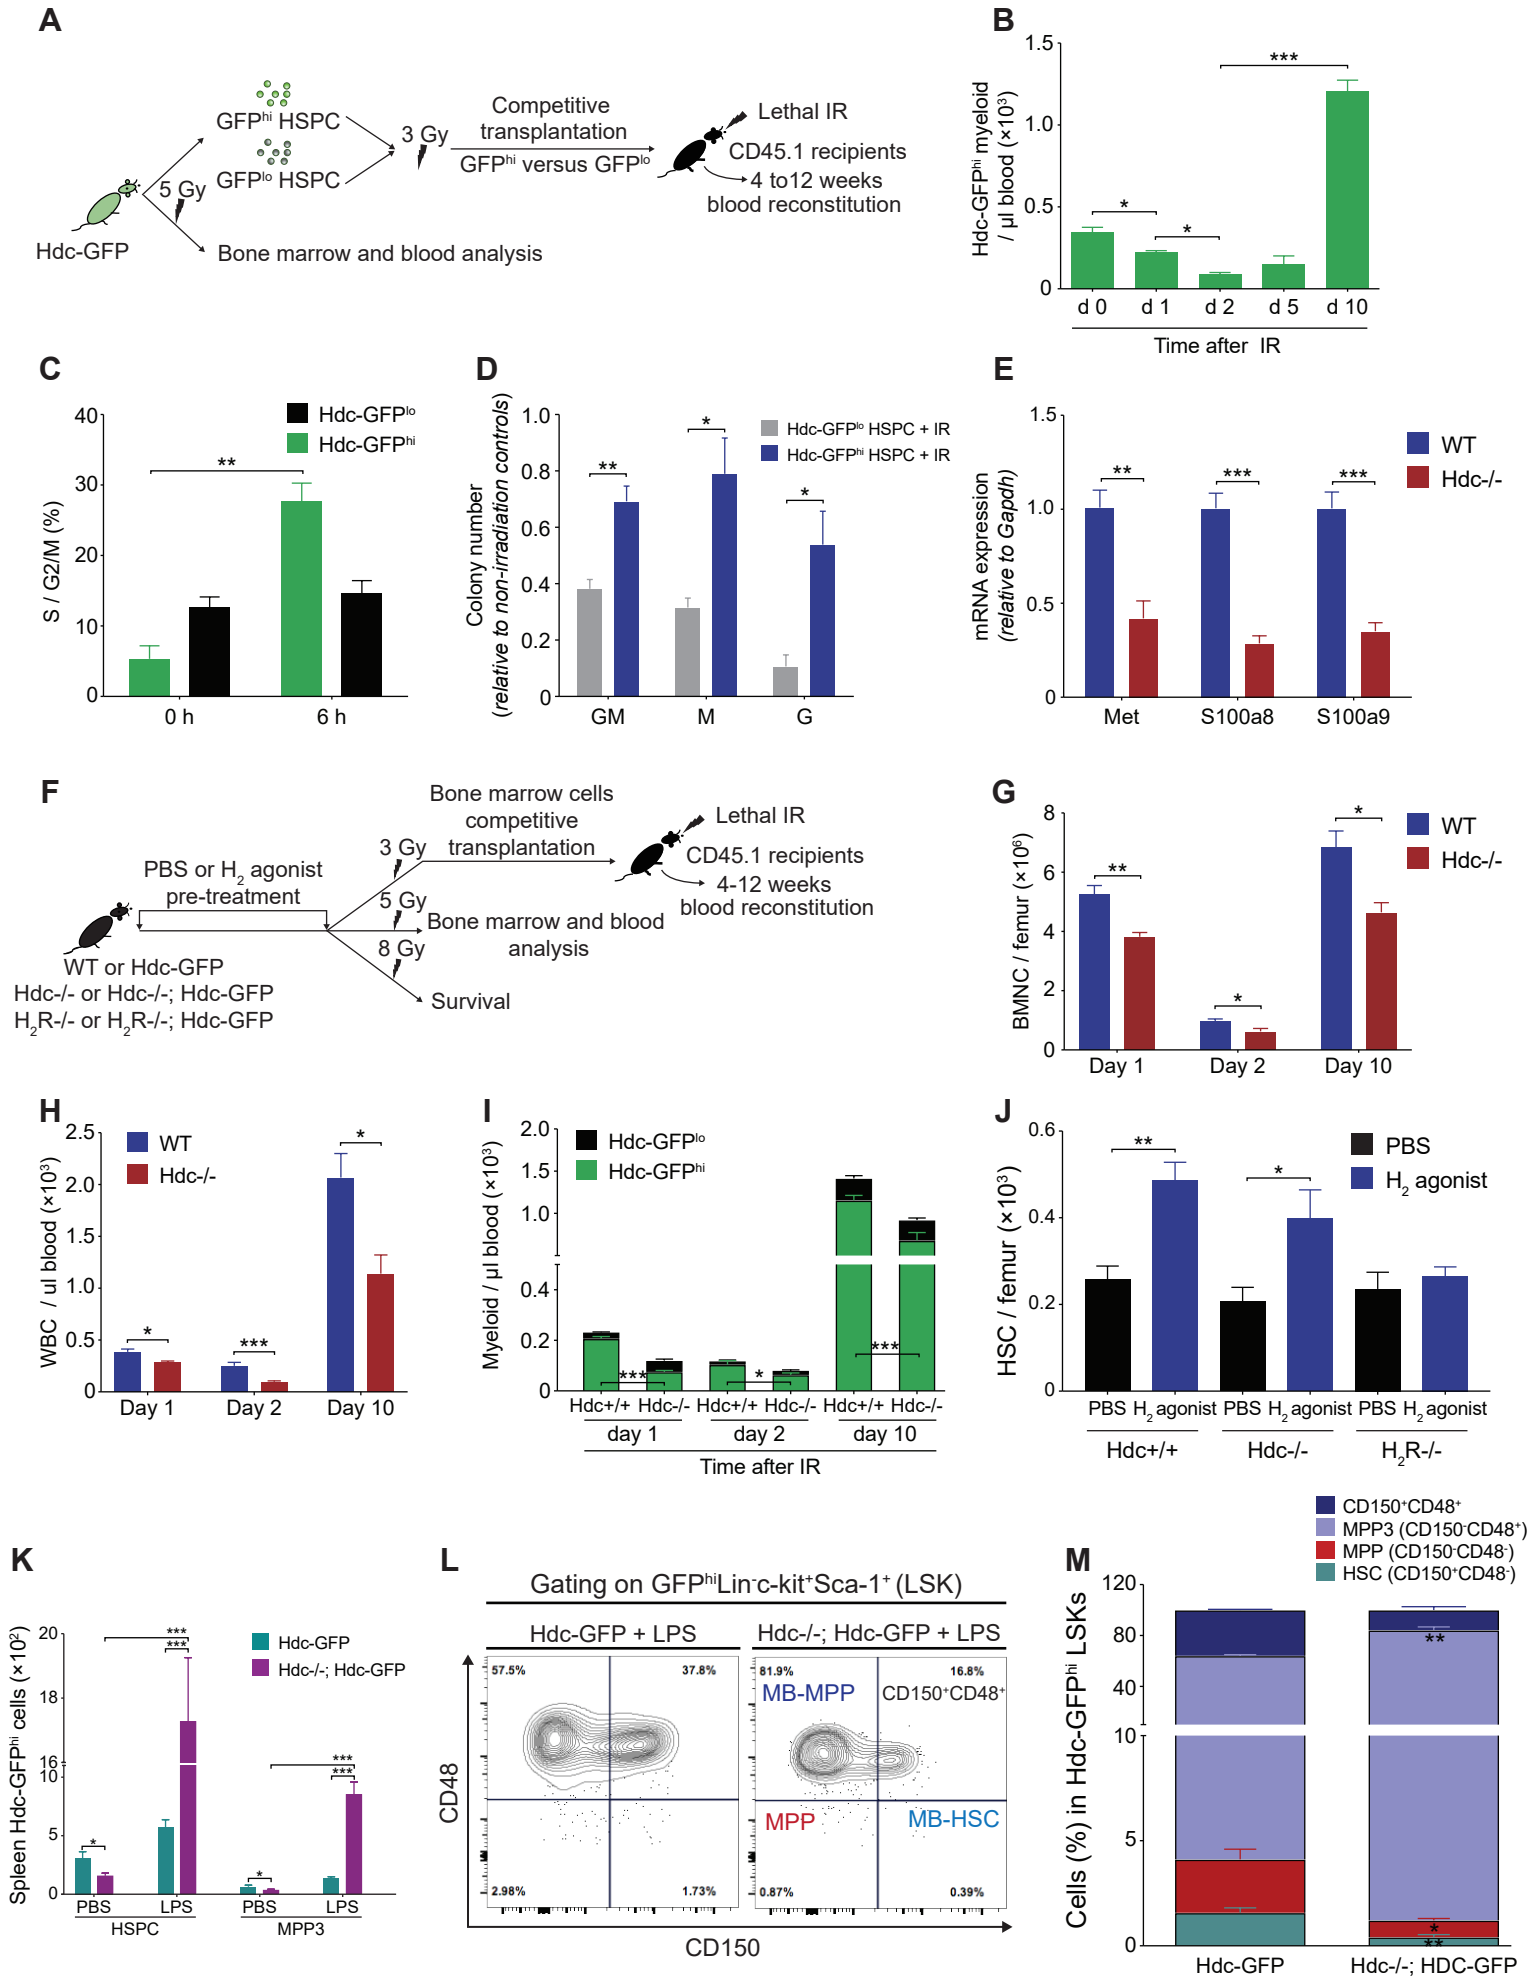

**Figure S1. Hdc-GFP Expression in HSCs, Progenitors and BM Stromal Cells, Related to Figure 1**

(A) Schematic diagram showing the protocol for HSC cell sorting and assessment of purity. (B-E) Representative flow plots of HSPC ( $\text{Lin}^{-}\text{c-kit}^{+}\text{Sca-1}^{+}$ , LSK) and HSC ( $\text{Lin}^{-}\text{c-kit}^{+}\text{Sca-1}^{+}\text{CD150}^{+}\text{CD48}^{-}$ ) (B);  $\text{Lin}^{-}\text{IL-7Ra}^{-}\text{c-kit}^{+}\text{Sca-1}^{-}\text{CD34}^{+}\text{CD16/32}^{\text{lo}}$  common myeloid progenitor (CMP),  $\text{Lin}^{-}\text{IL-7Ra}^{-}\text{c-kit}^{+}\text{Sca-1}^{-}\text{CD34}^{+}\text{CD16/32}^{\text{hi}}$  granulocyte and macrophage progenitor (GMP), and  $\text{Lin}^{-}\text{IL-7Ra}^{-}\text{c-kit}^{+}\text{Sca-1}^{-}\text{CD34}^{-}\text{CD16/32}^{\text{lo}}$  megakaryocyte and erythrocyte progenitor (MEP) (C);  $\text{Lin}^{-}\text{Flt-3}^{+}\text{c-kit}^{\text{hi}}\text{CD115}^{+}\text{CX3CR1}^{+}$  macrophage and dendritic cell progenitor (MDP) and  $\text{Lin}^{-}\text{Flt-3}^{+}\text{c-kit}^{\text{lo}}\text{CD115}^{+}\text{Cx3cr1}^{+}$  common dendritic progenitor (CDP) (D);  $\text{Lin}^{-}\text{c-kit}^{\text{lo}}\text{Sca-1}^{\text{lo}}\text{Flt-3}^{+}\text{IL-7Ra}^{+}$  common lymphoid progenitor (CLP) (E). (F) Representative flow plots of BM stromal endothelial cells ( $\text{CD45}^{-}\text{Ter119}^{-}\text{CD31}^{+}$ ) and mesenchymal progenitor cells ( $\text{CD45}^{-}\text{Ter119}^{-}\text{CD31}^{-}$ ) in Hdc-GFP; Cxcl12-DsRed mice ( $n = 3$ ). (G and H) mRNA expression levels of Hdc and inflammatory signaling (IL6, IL7, and IFN- $\gamma$ ) in HSCs, HSPCs, GMPs, and blood myeloid cells from Hdc-GFP mice were similar to WT mice ( $n = 3$  per group). (I) Compared to WT mice, protein levels of histamine, IL6, IL7, and IFN- $\gamma$  in serum and BM supernatant of Hdc-GFP mice showed no significant changes ( $n = 3$  per group). (J and K) The numbers of HSPCs, GMP, blood myeloid cells, and lymphocytes in young (4-month-old) and aged (16-month-old) wild type or Hdc-GFP mice ( $n = 3$  per group) (J). The percentage of Hdc-GFP $^{\text{hi}}$  blood myeloid cells (K). (L and M) Representative fluorescence images of bone frozen sections of Hdc-GFP; Cxcl12-DsRed mice ( $n = 3$ ) (L) and Hdc-GFP mice ( $n = 3$ ) bone sections stained with anti-Laminin antibody (M). For all panels,  $\pm$  SEM is shown. \* $p < 0.05$ ; \*\* $p < 0.01$ ; \*\*\* $p < 0.001$ . n.s., not significant. n.d., not detectable. n indicates biological replicates. For all experiments greater than or equal to two independent experiments were performed unless otherwise indicated. Data were analyzed with two-tailed Student's t-test (G-K).

**Figure S2. Hdc-GFP $^{\text{hi}}$  HSCs and Lineage-committed Progenitors Exhibit Greater Myeloid Lineage Expansion Capacity, Related to Figure 1**

(A) Gr1<sup>hi</sup> cells expressed higher Hdc mRNA within CD11b<sup>+</sup>Gr1<sup>+</sup> myeloid population (n = 3 per group). (B) Percentage of myeloid CFU colonies derived from Hdc-GFP<sup>hi</sup> and Hdc-GFP<sup>lo</sup> HSCs in M3434 Methylcellulose medium (n = 3 - 5 per group). (C) Myeloid CFU in M3534 Methylcellulose medium, showing numbers of large colonies from CMPs (3,000 Hdc-GFP<sup>hi</sup> versus Hdc-GFP<sup>lo</sup>) (n = 4 per group) and GMPs (5,000 Hdc-GFP<sup>hi</sup> versus Hdc-GFP<sup>lo</sup>) (n = 3 per group). Five independent experiments. (D) Representative microscopic images (left) and quantification of density (right) of a single colony (25 colonies) grown from sorted single Hdc-GFP<sup>hi</sup> or Hdc-GFP<sup>lo</sup> HSC. Five independent experiments. (E) Myeloid/B ratio and B cell-related colony number of colony-forming comparing per Hdc-GFP<sup>hi</sup> and Hdc-GFP<sup>lo</sup> HSPCs (n = 4 Hdc-GFP<sup>hi</sup>, n = 3 Hdc-GFP<sup>lo</sup>). (F) In vitro culture of Hdc-GFP<sup>hi</sup> and Hdc-GFP<sup>lo</sup> HSCs from Hdc-GFP mice, showing the stability (n = 4). (G) Experimental protocol of competitive BM transplantation assays comparing Hdc-GFP<sup>hi</sup> and Hdc-GFP<sup>lo</sup> HSCs. (H-J) One year after transplantation, recipient mice of 20 Hdc-GFP<sup>hi</sup> (n = 6) or Hdc-GFP<sup>lo</sup> HSCs (n = 5) were analyzed, bar graphs show quantification BM donor-derived progenitors (H) and blood donor chimerism (I). Flow plots (J) show the representative gating of blood donor reconstitution. (K) Donor chimerism in the blood of the secondary recipients from 20 Hdc-GFP<sup>hi</sup> or Hdc-GFP<sup>lo</sup> HSCs (n = 10 per recipient group). (L) Blood donor-derived myeloid/B and myeloid/T ratio in secondary BM transplant recipients analyzed in (K) at 16 weeks of secondary transplantation. (M) Contribution of 50 Hdc-GFP<sup>hi</sup> (n = 8) or Hdc-GFP<sup>lo</sup> HSCs (n = 9) in the blood of lethally irradiated recipients after transplantation at indicated time points. (N) Limiting dilution assay comparing Hdc-GFP<sup>hi</sup> or Hdc-GFP<sup>lo</sup> HSCs, Myeloid or Lymphoid reconstitution potential were examined at 32 weeks after transplantation (n = 8 - 12 per cell dose). Table shows number of responders in each group. (O) Donor Myeloid/T and Myeloid/B reconstitution ratio from recipients transplanted with single Hdc-GFP<sup>hi</sup> (n = 43) or Hdc-GFP<sup>lo</sup> HSCs (n = 42) from Hdc-GFP mice. Table shows number of responders in each group. (P and Q) Comparison of mRNA levels of DNA replication and mitochondrial function (P) and stress response genes (Q) between Hdc-GFP<sup>hi</sup> and Hdc-GFP<sup>lo</sup> BM HSCs. For all panels, ± SEM is shown. \*p < 0.05; \*\*p < 0.01; \*\*\*p < 0.001.



n indicates biological replicates. For all experiments greater than or equal to two independent experiments were performed unless otherwise indicated. Data were analyzed with two-tailed Student's t-test (A-C, E-F, H-M, and O-Q), Mann-Whitney test (D), or Poisson distribution with Pearson's chi-squared test (N).

**Figure S3. Gene Transcription Profiles and Response to Myeloid or Lymphoid Stimulus Differentially, Related to Figure 1-3**

(A) GO biological processes upregulated (red bars) or downregulated (blue bars) in Hdc-GFP<sup>hi</sup> HSPCs compared to Hdc-GFP<sup>lo</sup> HSPCs (n = 4 per group). (B) Representative genes based upon GO and KEGG pathways (n = 4 per group). (C) Relative mRNA expression of TLRs in myeloid cell compartments (n = 4 per group). (D) Histamine levels in supernatants from in vitro cultured compartments of HSC or CD11b<sup>+</sup>Gr1<sup>+</sup> myeloid cells isolated from Hdc-GFP mice in response to LPS treatment (n = 6 per group). (E) Frequencies of HSCs in spleen of Hdc-GFP mice at 24 hours after LPS treatment (n = 3 - 4 per group). (F-G) Absolute numbers of Hdc-GFP<sup>hi</sup> and Hdc-GFP<sup>lo</sup> HSPC (F), CLP, GMP, and MEP (G) in BM of Hdc-GFP mice treated with PBS, IFN- $\gamma$ , or IL6 (n = 3 per group). For all panels,  $\pm$  SEM is shown. \*p < 0.05; \*\*p < 0.01; \*\*\*p < 0.001. n indicates biological replicates. For all experiments greater than or equal to two independent experiments were performed unless otherwise indicated. Data were analyzed with two-tailed Student's t-test (C, D, and F-G) or one-way analysis of variation (ANOVA) with Bonferroni post-hoc test (E).

**Figure S4. Increased Myeloid Proliferation in Hdc<sup>-/-</sup> mice, Related to Figure 4**

(A) Cell cycle analyses of BM Hdc-GFP<sup>hi</sup> and Hdc-GFP<sup>lo</sup> HSCs and progenitors of Hdc-GFP mice (n = 3) and Hdc<sup>-/-</sup>; Hdc-GFP mice (n = 4). (B) Noncompetitive transplantation of  $4 \times 10^5$  unfractionated BM cells from Hdc<sup>-/-</sup> mice (45.2) or Hdc<sup>+/+</sup> age-matched littermates into lethally irradiated WT mice (45.1). Analyses of peripheral blood reconstitution at 4 and 8 weeks (n = 10 per group). (C-D) Mice were intravenously injected with 250 mg/kg 5-FU, and the number of BM HSCs and HSPCs (C) and blood myeloid cells (D) was quantified 5 days after 5-FU treatment (n = 5 per group). (E-G) qRT-PCR analysis shows upregulation of erythrocyte proliferation (E), myeloid proliferation (F), and

apoptosis genes (G) in Hdc<sup>-/-</sup> HSPCs compared to WT controls (n = 4 per group). (H-K) Biological processes in GO and KEGG pathway analysis that were upregulated (H) or downregulated (I) in Hdc<sup>-/-</sup> HSPCs compared to WT controls (n = 4 per group); (J) and (K) showing representative genes analyzed in GO and KEGG pathway. For all panels, ± SEM is shown. \*p < 0.05; \*\*p < 0.01; \*\*\*p < 0.001. n indicates biological replicates. For all experiments greater than or equal to two independent experiments were performed unless otherwise indicated. Data were analyzed with one-way analysis of variation (ANOVA) with Bonferroni post-hoc test (A) or two-tailed Student's t-test (B-G).

**Figure S5. Histamine/H<sub>2</sub>R Axis Maintains BM HSC Quiescence, Related to Figure 5**

(A and B) Direct contact between MB-HSCs and GFP<sup>+</sup>Gr1<sup>+</sup> myeloid cells on frozen bone sections, showing representative single MB-HSCs (yellow arrows) surrounded by GFP<sup>+</sup>Gr1<sup>+</sup> myeloid cells (left) and quantification (B). Four independent experiments. (C and D) Distribution (C) and quantification (D) of GFP<sup>+</sup> MB-HSC and myeloid clusters in close proximity (< 5 μm) to Laminin<sup>+</sup> matrix and vessels on bone frozen sections. Inserts show magnified images demonstrating representative clusters composed of one MB-HSC and two (a) or more than two (b) Hdc-GFP<sup>+</sup> myeloid cells. (c) Magnified image shows a representative cluster that was not close to Laminin<sup>+</sup> cells. Four independent experiments. (E) Experimental protocol of Hdc<sup>hi</sup> myeloid cell depletion and rescue studies. (F) Representative flow histogram showing tdTomato expression in CD11b<sup>+</sup>Gr1<sup>+</sup> myeloid cells from iDTR/DT experimental groups in Figure 5D. (G) Representative plots showing no expression of tdTomato in HSCs of Hdc-CreER<sup>T2</sup>; tdTomato mice received 2 weeks of tamoxifen diet treatment. (H) Quantification of BM HSCs and HSPCs in tamoxifen/DT-treated Hdc-CreER<sup>T2</sup>; tdTomato; iDTR mice (n = 6 - 8 per group). (I-J) mRNA levels of CreER<sup>T2</sup> (I) and iDTR (J) in Hdc-GFP<sup>hi</sup> or Hdc-GFP<sup>lo</sup> HSC, HSPC, and myeloid cells (n = 4 per group). (K) Histamine levels (ng/ml) measured in the BM cell-free supernatant in groups of DT-treated DTR<sup>+</sup> and DTR<sup>-</sup> mice (n = 5 - 6 per group). (L) Representative flow plots of BM Hdc-GFP<sup>hi</sup> cells in Hdc-GFP mice analyzed in Figure 5F. (M) Analysis of histamine receptor mRNA expression by qRT-PCR in HSCs (n = 4) and HSPCs (n = 3).

(N) Relative expression of H<sub>2</sub>R in Hdc-GFP<sup>hi</sup> or Hdc-GFP<sup>lo</sup> HSCs or progenitors (n = 3). (O) The frequency of G<sub>0</sub> cells in HSPCs in stroma co-culture with or without the addition of histamine (n = 5 - 6 per group). (P) Lineage of cells/HSPCs ratio from the co-culture of Hdc<sup>-/-</sup> HSPCs with Hdc<sup>-/-</sup> stromal cells to which was added exogenous H<sub>2</sub> agonist (n = 4 per group) or PBS (n = 4). (Q and R) Quantification of percentage of G<sub>0</sub> phase cells in HSPCs in triple cell co-culture system (n = 4 - 6 per group). For all panels, ± SEM is shown. \*p < 0.05; \*\*p < 0.01; \*\*\*p < 0.001. n.d., not detectable. n indicates biological replicates. For all experiments greater than or equal to two independent experiments were performed unless otherwise indicated. Data were analyzed with one-way analysis of variation (ANOVA) with Bonferroni post-hoc test (B and O), two-tailed Student's t-test (D, H-J, and M, N, and P-R).

### **Figure S6. H<sub>2</sub> Agonist Protects HSC from Injury, Related to Figure 6**

(A) Experimental protocol. (B) Number of Hdc-GFP<sup>+</sup> myeloid cells in blood of 5 Gy-irradiated Hdc-GFP mice. (C) Frequencies of S/G<sub>2</sub>/M phase of HSCs showing Hdc-GFP<sup>hi</sup> and Hdc-GFP<sup>lo</sup> compartments, respectively, in Hdc-GFP mice BM after 5 Gy of radiation. (D) 3 Gy-irradiated 1500 Hdc-GFP<sup>hi</sup> HSPCs expanded more myeloid colonies in vitro than the same number of Hdc-GFP<sup>lo</sup> HSPCs which received the same dosage of IR (n = 3 per group). Data are presented as relative to non-irradiated control. (E) qRT-PCR analysis of stress responsive genes, which were downregulated in Hdc<sup>-/-</sup> BM HSPCs compared to WT controls (n = 4 per group). (F) Experimental protocol of H<sub>2</sub> agonist on radiation protection experiments. (G and H) BM nucleated cell (BMNC) number (G) and white blood cell (WBC) number (H) in WT or Hdc<sup>-/-</sup> mice after 5 Gy of radiation. (I) Number of blood myeloid cells in mice after 5 Gy of radiation. (J) Number of HSCs in 5 Gy-irradiated WT, Hdc<sup>-/-</sup>, or H<sub>2</sub>R<sup>-/-</sup> mice pretreated with either H<sub>2</sub> agonist or PBS (n = 4 - 5 per group). (K) Absolute number of spleen Hdc-GFP<sup>hi</sup> MB-HSPCs and Hdc-GFP<sup>hi</sup> MB-MPP (MPP3) in LPS-treated Hdc-GFP (n = 6), Hdc<sup>-/-</sup>; Hdc-GFP mice (n = 5), and PBS controls (n = 3 - 5 per group) at 24 hours. (L and M) Net frequencies of BM HSCs and multipotent progenitors in LPS treated mice (n = 4 per group), shows representative plots in (H), and quantification in (I). For all panels, ± SEM is shown. \*p < 0.05; \*\*p < 0.01; \*\*\*p

< 0.001. n indicates biological replicates. For all experiments greater than or equal to two independent experiments were performed unless otherwise indicated. Data were analyzed with one-way analysis of variation (ANOVA) with Bonferroni post-hoc test (B), two-tailed Student's t-test (C-E, G-K, and M).

| Gene Symbol | Organism     | Gene Name                                                                 | Forward Primer (5'- 3')   | Reverse Primer (5' - 3') |
|-------------|--------------|---------------------------------------------------------------------------|---------------------------|--------------------------|
| Nr4a1       | Mus musculus | nuclear receptor subfamily 4, group A, member 1                           | GCCTAGCACTGCCAAATTG       | TCTGCCCACTTTCCGATAAC     |
| Cxcr2       | Mus musculus | chemokine (C-X-C motif) receptor 2                                        | TCTTCCAGTTCAACCAGCC       | ATCCACCTTGAATTCTCCCATC   |
| Mmp9        | Mus musculus | matrix metalloproteinase 9                                                | GATCCCCAGAGCGTCATTC       | CCACCTTGTTACCTCATTTTG    |
| Slpi        | Mus musculus | secretory leukocyte peptidase inhibitor                                   | GATCCCCAGAGCGTCATTC       | CCACCTTGTTACCTCATTTTG    |
| Ap3b1       | Mus musculus | adaptor-related protein complex 3, beta 1 subunit                         | CCCAGACCACAGACTCTTAATTAG  | TTAGAAATGACACCAGCCTCC    |
| Atp11c      | Mus musculus | ATPase, class VI, type 11C                                                | CCAGCCCAGTTACCAGTG        | CCTCACTCGCTTTGCATTTTC    |
| Cdc42       | Mus musculus | cell division cycle 42                                                    | CATGTCTCCTGATATCCTACACAAC | TGTCATAATCCTCTTGCCCTG    |
| Anln        | Mus musculus | anillin, actin binding protein                                            | GGTTCCTACTGAAAGCGAAATG    | CTCATCGTCCACACTCATCTC    |
| Birc5       | Mus musculus | baculoviral IAP repeat-containing 5                                       | AAGGAATTGGAAGGCTGGG       | TTCTTGACAGTGAGGAAGGC     |
| Ccna2       | Mus musculus | cyclin A2                                                                 | GTCCTTGCTTTGACTTGCC       | ACGGGTGAGCATCTATCAAAC    |
| Ccnb1       | Mus musculus | cyclin B1                                                                 | CTGACCCAAACCTCTGTAGTG     | CCTGTATTAGCCAGTCAATGAGG  |
| Ccne2       | Mus musculus | cyclin E2                                                                 | GACGTTTCATCCAGATAGCTCAG   | TCCATTCCAAACCTGAAGC      |
| Grina       | Mus musculus | glutamate receptor, ionotropic, N-methyl D-aspartate-associated protein 1 | ATCTCCCTCATTGTTCTCAGC     | ATGACTGCCTCCGTGTTG       |
| Gabbr1      | Mus musculus | gamma-aminobutyric acid (GABA) B receptor, 1                              | CCCACTCCACAATCCCAC        | ATCTCAATCCCAGCCTCTTTC    |
| Rbl1        | Mus musculus | retinoblastoma-like 1 (p107)                                              | AGAGTCAAGGAAGTTCGCAC      | GGTCATCTCCAAACAGTCTCC    |
| Rrm2        | Mus musculus | ribonucleotide reductase M2                                               | AAGCTCTGAAACCCGATGAG      | TGGAAGCCATAGAAACAGCG     |
| Cycs        | Mus musculus | cytochrome c, somatic                                                     | AAGGGAGGCAAGCATAAGAC      | ATTCTCCAAATACTCCATCAGGG  |
| Dpp4        | Mus musculus | dipeptidylpeptidase 4                                                     | AGTGCCTTAGTTGTGACCTG      | TCGCAGCTCTTTATGATCCG     |
| Ogt         | Mus musculus | O-linked N-acetylglucosamine (GlcNAc) transferase                         | ATGGGAATCTCTGCTTGATAAG    | GCATAAGGTGTGAAGTAGGGTG   |
| Tlr4        | Mus musculus | toll-like receptor 4                                                      | TTCAGAACTTCAGTGGCTGG      | TGTTAGTCCAGAGAACTTCCTG   |
| Tlr2        | Mus musculus | toll-like receptor 2                                                      | ACAACCTACCGAAACCTCAGAC    | ACCCGAGAAGCATCACATG      |
| Tlr6        | Mus musculus | toll-like receptor 6                                                      | CCGTCACTGCTGGAAATAGAG     | ACGATGGGTTTTCTGTCTTGG    |
| Il7r        | Mus musculus | interleukin 7 receptor                                                    | TCTGGAGAAAGTGGAAATGCC     | AGCTGTGTTGATGTCTGAGTC    |
| Cd19        | Mus musculus | CD19 antigen                                                              | GAGAAGGAAAAGGAAGCGAATG    | AGAGGTAGATGTAGGAAGGGAG   |
| Fgf13       | Mus musculus | fibroblast growth factor 13                                               | AAAGACGAGGACAGCACTTAC     | AGGTGTGAAATGTTCCGAGG     |
| Lpar1       | Mus musculus | lysophosphatidic acid receptor 1                                          | CTATGTTCCGCCAGAGGACTATG   | GCAATAACAAGACCAATCCCG    |
| Epb4.2      | Mus musculus | erythrocyte membrane protein band 4.2                                     | CACTATCACCCCTGAACTCCG     | AGAGGAAATTGGGAAGATGGC    |
| Epb4.9      | Mus musculus | dematin actin binding protein                                             | GAAAAGTCATTGCCCATCCG      | AATTCTGTGGACTGTAGCCG     |

|                     |              |                                                 |                         |                         |
|---------------------|--------------|-------------------------------------------------|-------------------------|-------------------------|
| Rhd                 | Mus musculus | Rh blood group, D antigen                       | CGTGCGGCCAAGTATTTTG     | GCAGACAAAAGGGACACAAAG   |
| Rhag                | Mus musculus | Rhesus blood group-associated A glycoprotein    | TGGAGGTTTGCTTACAGGTC    | ACGTGGTTGTGATTTGCATG    |
| Spna1               | Mus musculus | spectrin alpha, erythrocytic 1                  | CCTTAAATGTCCCCTCCAGTC   | GTTCTTGATCTGCCTAGCCTC   |
| Klf1                | Mus musculus | Kruppel-like factor 1 (erythroid)               | CCTCCATCAGTACACTCACC    | CCTCCGATTTCCAGACTCACG   |
| Tac4                | Mus musculus | tachykinin 4                                    | AGAGGAACTGGCTTTTGGTG    | GCTTCCCCATCAGACCATAG    |
| Aqp1                | Mus musculus | aquaporin 1                                     | CTGGCGATTGACTACACTGG    | AAGTCATAGATGAGCACTGCC   |
| Snca                | Mus musculus | synuclein, alpha                                | GGCAGTGAGGCTTATGAAATG   | TGGAAGTGGCACTTGTACG     |
| Cd36                | Mus musculus | CD36 antigen                                    | GCGACATGATTAATGGCACAG   | GATCCGAACACAGCGTAGATAG  |
| Nlr4                | Mus musculus | NLR family, CARD domain containing 4            | GGAAAAGGATGGGAATGAAGC   | CATCAATGTAGTGAGCTCTCCC  |
| Epha7               | Mus musculus | Eph receptor A7                                 | AGAAGGAGAGTGGCTAGTACC   | GGACAACGAGAACAACACTGGAG |
| Lpar1               | Mus musculus | lysophosphatidic acid receptor 1                | CTATGTTTCGCCAGAGGACTATG | GCAATAACAAGACCAATCCCG   |
| Met                 | Mus musculus | met proto-oncogene                              | GACCTCAGTGCTCTAAATCCAG  | TCCAGCAAAGTCCCATGATAG   |
| Hdc                 | Mus musculus | histidine decarboxylase                         | CGTTGCCTACACCTCTGATC    | CCCTGTTGCTTGTCTTCCTC    |
| Il6                 | Mus musculus | interleukin 6                                   | AAACCGCTATGAAGTTCCTCTC  | GTGGTATCCTCTGTGAAGTCTC  |
| Il7                 | Mus musculus | interleukin 7                                   | CCTCCACTGATCCTTGTTCTG   | TCGGGCAATTACTATCAGTTCC  |
| Ifng                | Mus musculus | interferon gamma                                | AGGAACTGGCAAAGGATGG     | CAGGTGTGATTCAATGACGC    |
| CreER <sup>T2</sup> | Mus musculus | CreER <sup>T2</sup>                             | CTAGGATGCGTACCATCGTAC   | GGCATCCAGTCCCATCGATA    |
| iDTR                | Mus musculus | Inducible diphtheria toxin receptor             | TACGCCCTACCGCATCCGATCG  | TGGAACCTCCGATTCCCTAGC   |
| S100a8              | Mus musculus | S100 calcium binding protein A8 (calgranulin A) | AGTGTCCCTCAGTTTGTGCAG   | ACTCCTTGTGGCTGTCTTTG    |
| S100a9              | Mus musculus | S100 calcium binding protein A9 (calgranulin B) | GTTGATCTTTGCCTGTCATGAG  | AGCCATTCCCTTTAGACTTGG   |
| Gapdh               | Mus musculus | glyceraldehyde-3-phosphate dehydrogenase        | CCTTGTC AAGCTCATTTCCTGG | TCTTGCTCAGTGCCTTGC      |

**Table S1. Primers for quantitative RT-PCR, Related to Figure 1-3, S1-S6**
